# Supplementary material for: Organellar RNA Helicases as Key Tools in Plant Organellar RNA Splicing and Regulation of Gene Expression
Source: Preprints.org preprint supplement (doi:10.20944/preprints202403.0790.v1), 2024-03-14
Supplement: Supplementary file 1 [file supplementary]

**Supplementary Table S1.** RNA helicases encoded in *Arabidopsis thaliana* genome.

| Gene I.D. *1           | Protein I.D. / Gene function                                                  | Predicted loci*2 |
|------------------------|-------------------------------------------------------------------------------|------------------|
| Putative RNA helicases |                                                                               |                  |
| At1g05460              | RNA helicases SDE3, Post-transcriptional gene silencing                       | Nuc              |
| At1g06670              | Nucleuslear DEIH-box helicase (NIH)                                           | Nuc              |
| At1g08600              | ATRX/CHR20                                                                    | Nuc              |
| At1g11100              | SNF2 domain-containing protein                                                | Nuc              |
| At1g12770              | RH47, Regulating cell-to-cell transport via plasmodesmata                     | Mit              |
| At1g16280              | DEA(D/H)-box RNA helicase, RH36                                               | Nuc              |
| At1g16970              | KU70 homolog, Maintenance of the telomeric C strand                           | Nuc              |
| At1g20920              | DEAD box RNA helicase (RH42)                                                  | Nuc              |
| At1g20960              | EMB1507, U5 small Nucleuslear riboNucleusleoprotein helicase, putative        | Nuc              |
| At1g31970              | Stress response suppressor 1 (STRS1, RH5)                                     | Nuc              |
| At1g32490              | Encodes a homolog of the yeast PRP2 protein, RNA splicing                     | Nuc              |
| At1g35530              | DEA(D/H)-box RNA helicase family protein                                      | Nuc              |
| At1g48650              | DEA(D/H)-box RNA helicase family protein                                      | Mit              |
| At1g48920              | Nucleusleolin like 1 (AtNUCLEUS-L1), rRNA processing, ribosome biosynthesis   | Nuc              |
| At1g51380              | Putative translation initiation factor 4A (RH2)                               | Cyt              |
| At1g55150              | DEA(D/H)-box RNA helicase, putative (RH20)                                    | Nuc              |
| At1g59760              | RNA helicase, ATP-dependent, SK12/DOB1 protein                                | Nuc              |
| At1g59990              | DEA(D/H)-box RNA helicase, putative (RH22)                                    | Clp              |
| At1g61140              | SNF2 domain-containing protein, EDA16 (EMB-16)                                | Nuc              |
| At1g63250              | DEA(D/H)-box RNA helicase family protein (RH48), putative splicing factor     | Mit              |
| At1g71280              | DEA(D/H)-box RNA helicase family protein (RH55)                               | Nuc              |
| At1g72730              | DEA(D/H)-box RNA helicase protein, Eukaryote translation initiation factor 4A | Nuc              |
| At1g77050              | DEA(D/H)-box RNA helicase family protein (RH29)                               | Mit              |
| At1g79890              | RAD3-like DNA-binding helicase protein                                        | Nuc              |
| At1g79950              | RAD3-like DNA-binding helicase protein                                        | Nuc              |
| At2g01130              | DEA(D/H)-box RNA helicase family protein                                      | Nuc              |
| At2g01440              | DEA(D/H)-box RNA helicase family protein                                      | Mit              |
| At2g06990              | SK12/DOB1 protein, a putative DEXH-box RNA helicase                           | Nuc              |
| At2g07750              | DEA(D/H)-box RNA helicase family protein (RH33), group II intron splicing*3   | Mit              |
| At2g33730              | P-loop containing NTP hydrolases superfamily protein (RH21)                   | Nuc              |
| At2g35920              | RNA helicase family protein                                                   | Nuc              |
| At2g40700              | RNA helicase family protein (RH17)                                            | Nuc              |
| At2g42270              | U5 small nuclear ribonucleoprotein helicase                                   | Nuc              |
| At2g42520              | P-loop containing NTP hydrolases superfamily protein (RH37)                   | Nuc              |
| At2g45810              | DEA(D/H)-box RNA helicase family protein (RH6)                                | Cyt              |
| At2g47250              | RNA helicase family protein                                                   | Nuc              |
| At2g47330              | P-loop containing NTP hydrolases superfamily protein (RH24)                   | Nuc              |
| At3g01540              | DEAD-box RNA helicase, DRH1                                                   | Nuc              |
| At3g02060              | DEA(D/H)-box RNA helicase family protein                                      | Clp              |
| At3g06480              | DEAD box RNA helicase family protein (RH40)                                   | Nuc              |
| At3g06980              | DEA(D/H)-box RNA helicase family protein (RH50)                               | Clp              |
| At3g09620              | P-loop containing NTP hydrolases superfamily protein (RH45)                   | Nuc              |

|                        |                                                                                  |         |
|------------------------|----------------------------------------------------------------------------------|---------|
| At3g09720              | P-loop containing NTP hydrolases superfamily protein (RH57)                      | Nuc     |
| At3g13920              | Eukaryotic translation initiation factor 4A1; (RH4)                              | Cyt     |
| At3g16600              | SNF2 domain-containing protein                                                   | Nuc     |
| At3g16840              | P-loop containing NTP hydrolases superfamily protein (RH13)                      | Nuc     |
| At3g18600              | P-loop containing NTP hydrolases superfamily protein (RH51)                      | Nuc     |
| At3g22310              | Putative mitochondrial RNA helicase 1 (PMH1, RH9)                                | Mit     |
| At3g46960              | RNA helicase SK12/DOB1 protein, HUA enhancer 2 (HEN2)                            | Nuc     |
| At3g53110              | P-loop containing NTP hydrolases superfamily protein (LOS4)                      | Nuc/Cyt |
| At3g58510              | DEA(D/H)-box RNA helicase family protein; (RH11)                                 | Nuc     |
| At3g61240              | DEA(D/H)-box RNA helicase family protein (RH12)                                  | Nuc     |
| At3g62310              | RNA helicase family protein;                                                     | Nuc     |
| At4g00660              | RNAhelicase-like 8; (RH8)                                                        | Nuc     |
| At4g01020              | helicase domain-containing protein / IBR domain-containing protein               | Nuc     |
| At4g09730              | Introduction of the hidden break into the 23S rRNA in the chloroplasts (RH39)    | Clp     |
| At4g15850              | RNA helicase 1; plant DEAD box-like RNA helicase.                                | Nuc     |
| At4g16630              | DEA(D/H)-box RNA helicase family protein (RH28)                                  | Nuc     |
| At4g16680              | P-loop containing NTP hydrolases superfamily protein, similar to MEE29           | Nuc     |
| At4g18465              | RNA helicase family protein (EMB-2733)                                           | Nuc     |
| At4g25120              | Encodes a homolog of the yeast SRS2 helicase                                     | Nuc     |
| At4g33370              | DEA(D/H)-box RNA helicase family protein; (RH43)                                 | Nuc     |
| At4g34910              | P-loop containing NTP hydrolases superfamily protein (RH16)                      | Nuc     |
| At4g35740              | DEA(D/H)-box RNA helicase RECQL3                                                 | Nuc     |
| At5g05130              | DNA/RNA helicase protein (SNF2 domain-containing protein)                        | Nuc     |
| At5g05450              | P-loop containing NTP hydrolases superfamily protein (RH18)                      | Nuc     |
| At5g07810              | SNF2 domain-containing protein / HNH endonuclease domain-containing protein      | Nuc     |
| At5g08610              | P-loop containing NTP hydrolases superfamily protein (RH26)                      | Clp     |
| At5g08620              | Stress response suppressor 2 (STRS2, RH25)                                       | Nuc     |
| At5g10370              | Helicase domain-containing protein / IBR domain-containing protein               | Nuc     |
| At5g11170              | DEA(D/H)-box RNA helicase family protein (RH15)                                  | Nuc     |
| At5g11200              | DEA(D/H)-box RNA helicase family protein (RH56)                                  | Nuc     |
| At5g14610              | DEAD box RNA helicase family protein (RH46)                                      | Nuc     |
| At5g19210              | P-loop containing NTP hydrolases superfamily protein (RH58)                      | POs     |
| At5g41360              | Homolog of Xeroderma pigmentosum complementation group B 2 (XPB2)                | Nuc     |
| At5g41370              | Homolog of Xeroderma pigmentosum complementation group B 2 (XPB1)                | Nuc     |
| At5g51280              | DEAD-box protein abstrakt, putative; (RH35)                                      | Nuc     |
| At5g54910              | DEA(D/H)-box RNA helicase family protein; (RH32)                                 | Nuc     |
| At5g60990              | DEA(D/H)-box RNA helicase family protein; (RH10)                                 | Nuc     |
| At5g62190              | DEA(D/H)-box RNA helicase family protein; (PRH75)                                | Nuc     |
| At5g63120              | P-loop containing NTP hydrolases superfamily protein; ethylene-responsive (RH30) | Nuc     |
| At5g63630              | P-loop containing NTP hydrolases superfamily protein; (RH31)                     | Nuc     |
| At5g65900              | DEA(D/H)-box RNA helicase family protein; (RH27)                                 | Nuc     |
| Putative DNA helicases |                                                                                  |         |
| At1g08840              | EMB2411, putative DNA replication helicase                                       | Nuc     |
| At1g20750              | RAD3-like DNA-binding helicase protein                                           | Nuc     |
| At1g48310              | Chromatin remodeling factor18 (CRF18)                                            | Nuc     |
| At1g60930              | RECQ helicase L4B (AtRECQ4B ), Involved in homologous recombination              | Mit     |
| At2g07690              | Minichromosome maintenance (MCM) family protein, DNA replication initiation      | Nuc     |

|           |                                                                                    |     |
|-----------|------------------------------------------------------------------------------------|-----|
| At2g14050 | Minichromosome maintenance 9; MCM9                                                 | Nuc |
| At2g16440 | Minichromosome maintenance (MCM) family protein, DNA replication initiation        | Nuc |
| At2g20980 | Minichromosome maintenance 10, MCM10                                               | Nuc |
| At3g05740 | RECQ helicase I1 (RECQI1), DNA recombination                                       | Nuc |
| At3g09660 | Minichromosome maintenance 8 (MCM8)                                                | Nuc |
| At4g02060 | Minichromosome maintenance family protein MCM7                                     | Nuc |
| At1g48050 | KU80 family protein, Mutants are defective in T-DNA integration                    | Nuc |
| At1g31360 | RECQ helicase L2 (RECQL2), DNA unwinding                                           | Nuc |
| At5g20420 | Chromatin remodeling 42 (CHR42)                                                    | Nuc |
| At5g46280 | Minichromosome maintenance family protein MCM3                                     | Nuc |
| At5g63950 | chromatin remodeling 24                                                            | Nuc |
| At1g03750 | Chromatin remodeling 9; switch 2;                                                  | Nuc |
| At1g10930 | DNA helicase RECQ14A; (AtRECQ4A)                                                   | Nuc |
| At1g05490 | Chromatin remodeling 31                                                            | Nuc |
| At1g27880 | DEA(D/H)-box RNA helicase family protein; Similar to RecQ13 (Recq-like 3)          | Nuc |
| At2g02090 | SNF2 domain-containing protein; Chromatin remodeling 19                            | Nuc |
| At2g03270 | DNA-binding protein, putative;                                                     | Nuc |
| At2g30800 | RNA or DNA helicase (ATVT1); expressed specifically in tapetum and vascular tissue | Nuc |
| At2g13370 | Chromatin remodeling 5                                                             | Nuc |
| At3g27730 | DNA helicase (MER3); required for interference-sensitive meiotic crossover events  | Nuc |
| At3g51690 | DNA helicase homolog PIF1; PIF1 helicase                                           | Nuc |
| At3g54280 | DNA binding; ATP binding; nucleic acid binding helicase                            | Nuc |
| At5g22330 | P-loop containing NTP hydrolases superfamily protein (AtTIP49A)                    | Nuc |
| At5g27680 | RECQ helicase SIM; DNA helicase (RECQSIM)                                          | Nuc |
| At5g67630 | P-loop containing NTP hydrolases superfamily protein                               | Nuc |

\*1 – Gene i.d. according to ‘The Arabidopsis Information Resource’ (TAIR) database.

\*2 – Arabidopsis protein subcellular location database, SUBA (<https://suba.live/>); Clp – chloroplast/plastid, Cyt – cytosol, Mit – mitochondria, Nuc – nucleus, POs – peroxisome.

\*3 – This study.
