# Supplementary material for: Organellar RNA Helicases as Key Tools in Plant Organellar RNA Splicing and Regulation of Gene Expression
Source: Preprints.org preprint supplement (doi:10.20944/preprints202403.0790.v1), 2024-03-14
Supplement: Supplementary file 2 [file supplementary]

Splicing efficiencies (*rh33-1/Col-0*)

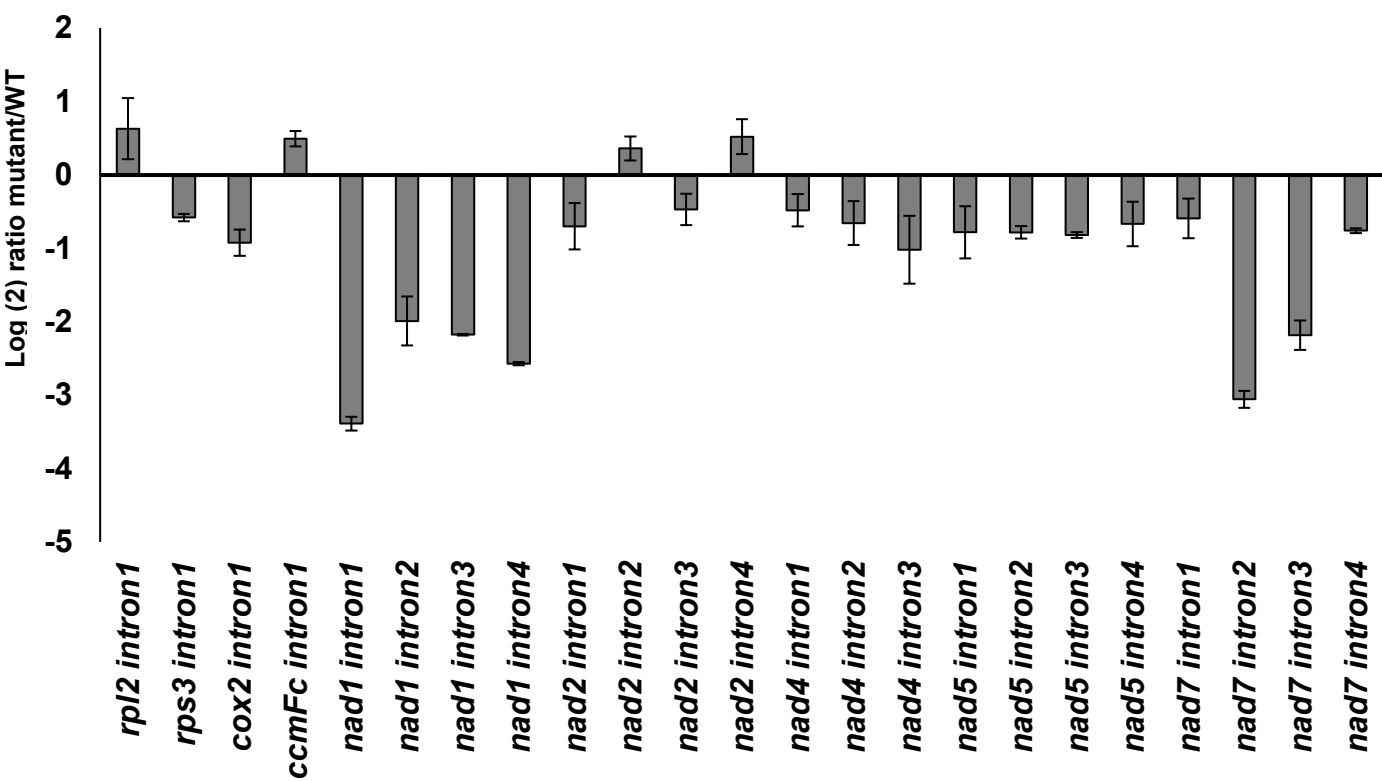

**Supplementary Fig. S2.** Analysis of the splicing efficiencies of mitochondrial group II-type introns in *rh33-1* mutant.
