# Supplementary material for: Organellar RNA Helicases as Key Tools in Plant Organellar RNA Splicing and Regulation of Gene Expression
Source: Preprints.org preprint supplement (doi:10.20944/preprints202403.0790.v1), 2024-03-14
Supplement: Supplementary file 3 [file supplementary]

# **A** At2g07750 (*RH33*) gene and T-DNA insertions

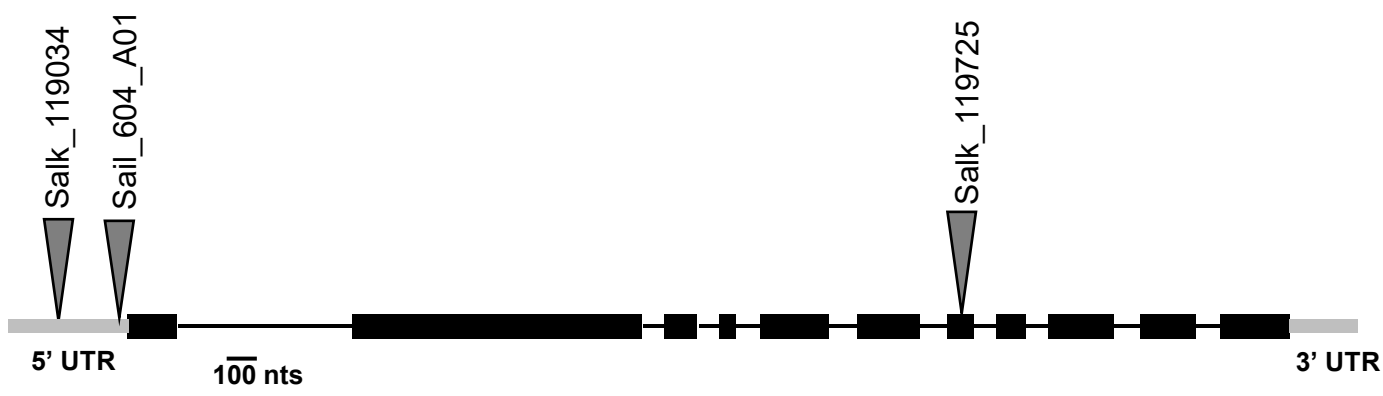

# **B**

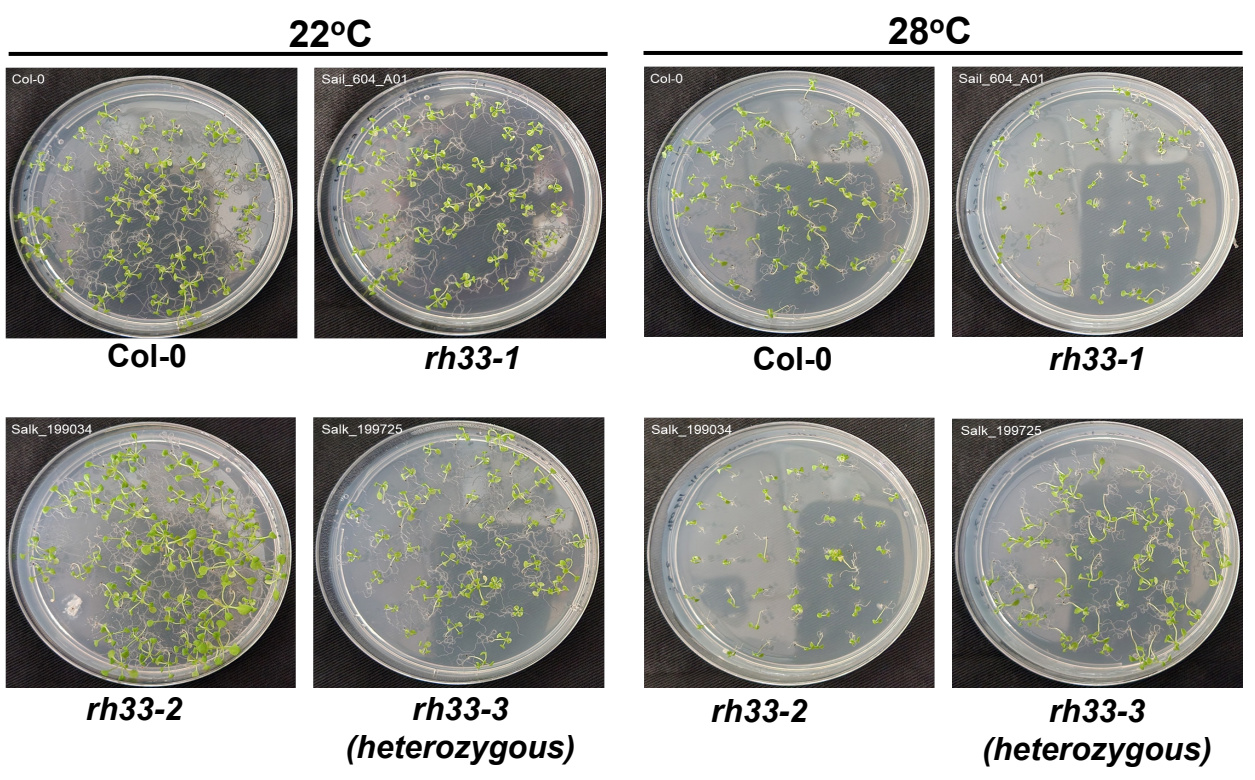

# **C**

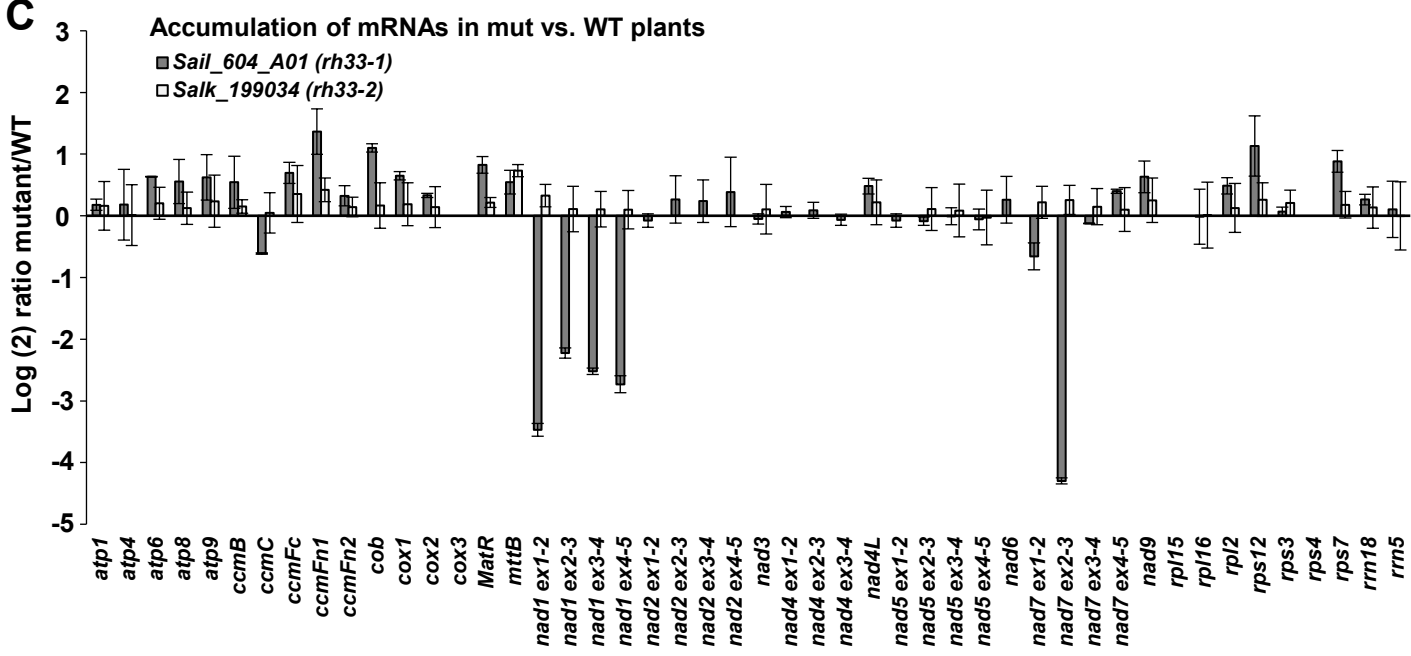

**Supplementary Fig. S1.** The RNA helicase RH33 affects the processing of various protein-encoding transcripts in Arabidopsis mitochondria.
