# Supplementary material for: Organellar RNA Helicases as Key Tools in Plant Organellar RNA Splicing and Regulation of Gene Expression
Source: Preprints.org preprint supplement (doi:10.20944/preprints202403.0790.v1), 2024-03-14
Supplement: Supplementary file 5 [file supplementary]

Archive with 4 entries (4 files):
- Fig. S1 RH33.pdf
- Fig. S2 RH33 splicing.pdf
- Supplementary Figure legends.pdf
- Table S1-At helicases.pdf
